# Supplementary material for: Human Lung Spheroids as In Vitro Niches of Lung Progenitor Cells with Distinctive Paracrine and Plasticity Properties
Source: PubMed Central journal article supplement (PMC5442776; doi:10.5966/sctm.2015-0374), 2016-09-22
Supplement: SCT3-6-0767-s001.pdf [file SCT3-6-0767-s001.pdf]

2

3 SUPPLEMENTAL FIGURES.

4

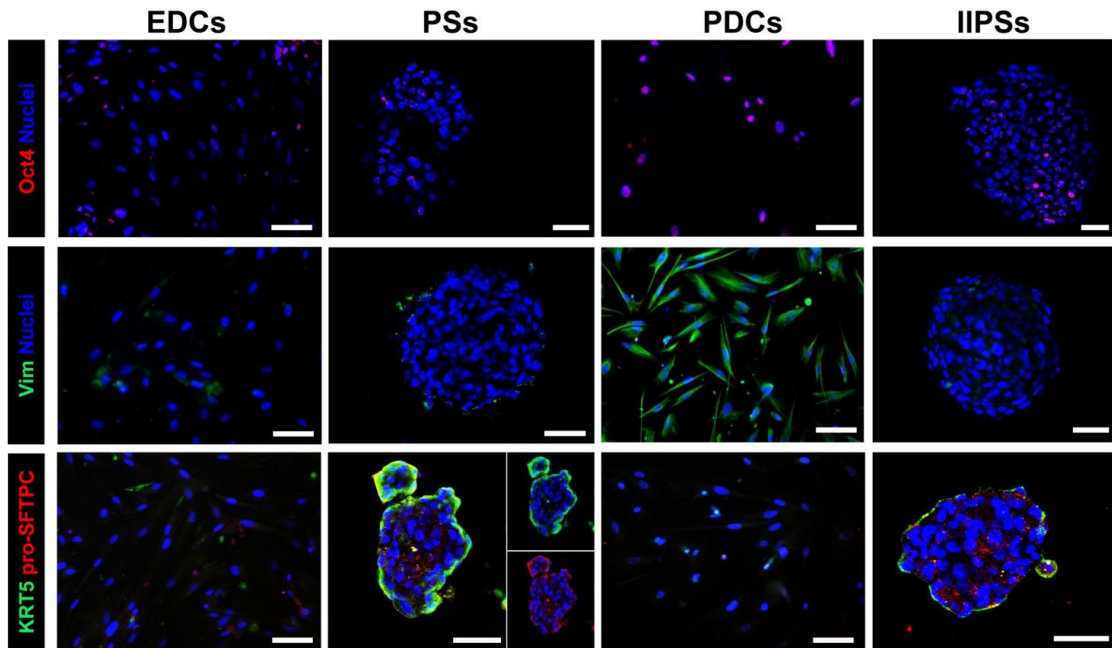

5

6 **Figure S1. Immunofluorescence stainings at various cell culture stages.** Oct4, vimentin (VIM),

6

7 cytokeratin 5 (KRT5) and pro-surfactant C (pro-SFTPC) stainings at the explant-derived cells (EDCs),

7

8 pneumospheres (PSs), PS-derived cells (PDCs) and secondary PSs (IIPsSs) stages. Oct4+ cells were enriched

8

9 after the EDC stage, and particularly at the PDC stage. A clear on/off switch was detectable for vimentin

9

10 (VIM) expression in PDCs, while the opposite regulation was observed for the epithelial markers KRT5 and

10

11 pro-SFTPC in PSs and IIPsSs. Scale bars = 50µm.

11

12

13

14

15

16

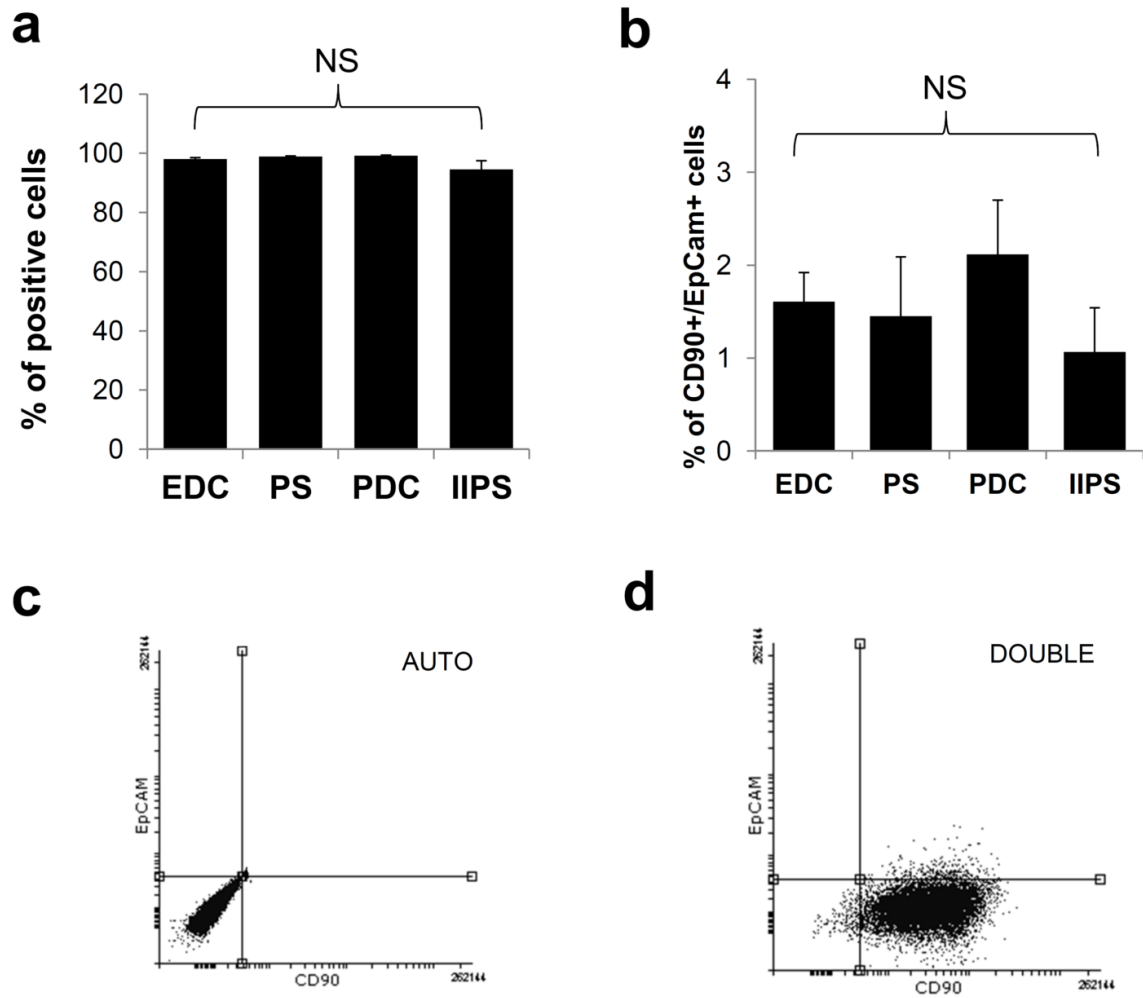

17

18

19

20

21

22

23

24

25

26

27

**Figure S2. Immunophenotype at different stages of culture.** The proportion of CD90+ cells (a) was constant at all culture stages (EDC, PS, PDC, IIPS), as it was the small subpopulation of EpCam+/CD90+ double positive cells. Representative dot-plot panels for the analysis of autofluorescence (c) and double staining (d). NS: not significant.

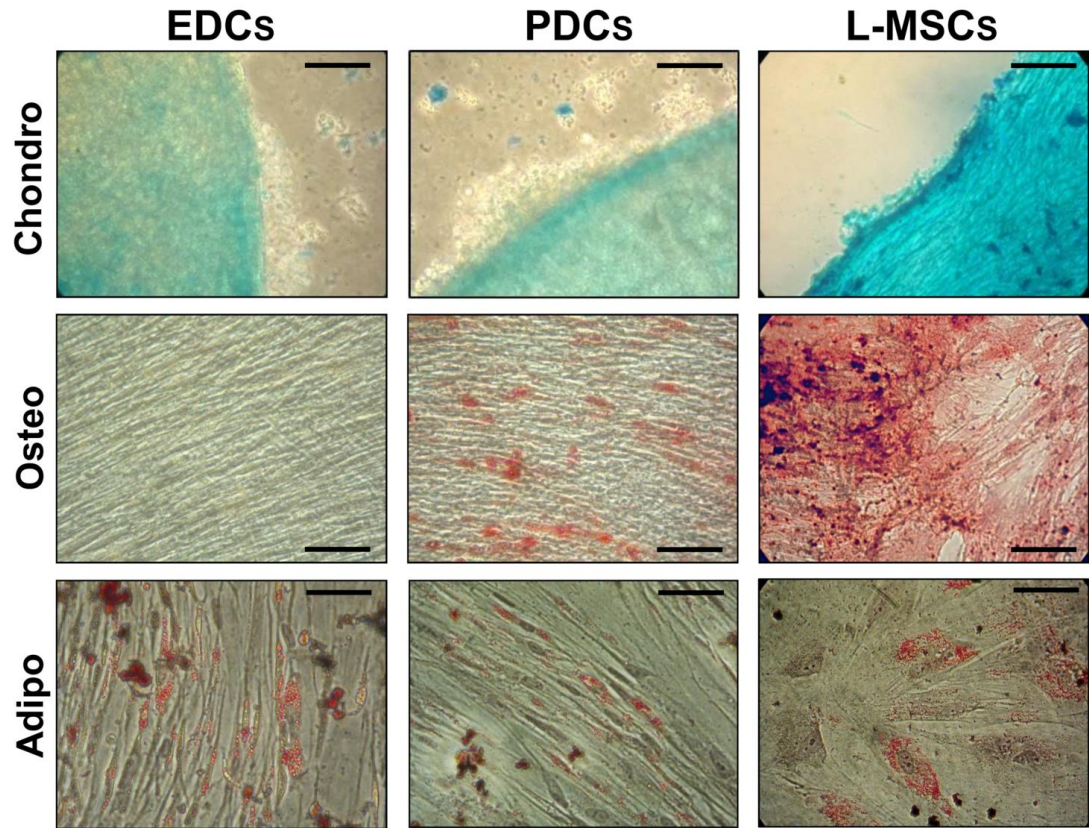

28

29

30

31

32

33

34

35

36

37

38

39

40

41

**Figure S3. Transdifferentiation assays of EDCs and PDCs for mesenchymal lineages.** Chondrogenic, osteogenic and adipogenic transdifferentiation potential of EDCs and PDCs was assessed. The mesenchymal potential of EDCs was not complete, since osteogenic differentiation was not detectable. Conversely, PDCs clearly contained a subpopulation with complete multi-lineage potential, although such potential was dramatically lower than pure lung mesenchymal stem cells (L-MSCs) isolated from lung parenchyma. Scale bars = 50 $\mu$ m.

## 42 SUPPLEMENTAL TABLES

43 Table S1. Primers sequence for realtime PCR.

| Target            | Sequence              | Tm (°C) | Size[bp] | Other names |
|-------------------|-----------------------|---------|----------|-------------|
| <b>TTF-1 fw</b>   | ACCAGGACACCATGAGGAAC  | 59,8    | 116      | Nkx2.1      |
| <b>TTF-1 rv</b>   | GCTCATGTTCATGCCGCT    | 60,9    |          |             |
| <b>SFTPA1 fw</b>  | ATCCCTGGAGAGTGTGGAGA  | 59,6    | 102      |             |
| <b>SFTPA1 rv</b>  | AAAGTCGTGGAGTGTGGCTT  | 59,7    |          |             |
| <b>SFTPA2 fw</b>  | CTGGAGAGCGTGGAGAGAAG  | 60,2    | 98       |             |
| <b>SFTPA2 rv</b>  | GAAGTCGTGGAGTGTGGCTT  | 60,3    |          |             |
| <b>SFTPC fw</b>   | AGCAAAGAGGTCCTGATGGA  | 59,8    | 103      |             |
| <b>SFTPC rv</b>   | CGATAAGAAGGCGTTTCAGG  | 59,8    |          |             |
| <b>SCGB1A1 fw</b> | ATGAAACTCGCTGTCACCCT  | 59,7    | 114      | CCSP        |
| <b>SCGB1A1 rv</b> | TGTGTCCATGAGGAGGGTTT  | 60,3    |          |             |
| <b>TP73L fw</b>   | CCACCCTACAGTACTGCCCT  | 59,1    | 114      | p63         |
| <b>TP73L rv</b>   | TTGTCTGTGTGCTCTGGGAC  | 59,9    |          |             |
| <b>NGFR fw</b>    | CTGCTGCTGTTGCTGCTTCT  | 62      | 98       | p75         |
| <b>NGFR rv</b>    | CAGGCTTTGCAGCACTCAC   | 60,7    |          |             |
| <b>KRT5 fw</b>    | GGAGCTCATGAACACCAAGC  | 60,8    | 104      | CK5         |
| <b>KRT5 rv</b>    | CTGGTCCAACCTCCTTCTCCA | 60,2    |          |             |

|                  |                        |      |     |              |
|------------------|------------------------|------|-----|--------------|
| <b>KRT14 fw</b>  | GGCCTGCTGAGATCAAAGAC   | 60   | 105 | CK14         |
| <b>KRT14 rv</b>  | TCTGCAGAAGGACATTGGC    | 60   |     |              |
| <b>KRT18 fw</b>  | GAGCACTTGGAGAAGAAGGG   | 59   | 126 | CK18         |
| <b>KRT18 rv</b>  | GTCAATCTGCAGAACGATGC   | 59,4 |     |              |
| <b>AQP1 fw</b>   | CTCTCAGGCATCACCTCCTC   | 59,9 | 109 |              |
| <b>AQP1 rv</b>   | GGAGGGTCCCGATGATCT     | 59,8 |     |              |
| <b>AQP5 fw</b>   | TGGCATCCTCTACGGTGTG    | 60,6 | 119 |              |
| <b>AQP5 rv</b>   | GCTGGAAGGTCAGAATCAGC   | 59,9 |     |              |
| <b>Oct4 fw</b>   | GTGGAGGAAGCTGACAACAA   | 58,9 | 118 |              |
| <b>Oct4 rv</b>   | TCTCCAGGTTGCCTCTCACT   | 60   |     |              |
| <b>TGFBR2 fw</b> | CTGCACATCGTCCTGTGG     | 59,8 | 110 |              |
| <b>TGFBR2 rv</b> | GGAAACTTGACTGCACCGTT   | 60,1 |     |              |
| <b>CTNNB1 fw</b> | AGGTCTGAGGAGCAGCTTCA   | 60,2 | 142 | beta-catenin |
| <b>CTNNB1 rv</b> | ATTGTCCACGCTGGATTTTC   | 59,9 |     |              |
| <b>Snail fw</b>  | CTTCTCTAGGCCCTGGCTG    | 59   | 134 |              |
| <b>Snail rv</b>  | CATCTGAGTGGGTCTGGAGG   | 59   |     |              |
| <b>Vim fw</b>    | ACCCACTCAAAAAGGACACTTC | 59   | 88  |              |
| <b>Vim rv</b>    | GGTCATCGTGATGCTGAGAA   | 59   |     |              |

44 Tm: melting temperature.

45

46 **Table S2. Complete panel of proteins screened by protein array in conditioned media.**

| POS            | POS            | POS             | POS           | NEG          | NEG            | ENA-78         | GCSF         | GM-CSF         | GRO       | GRO- $\alpha$ |
|----------------|----------------|-----------------|---------------|--------------|----------------|----------------|--------------|----------------|-----------|---------------|
| I-309          | IL-1 $\alpha$  | IL-1 $\beta$    | IL-2          | IL-3         | IL-4           | IL-5           | IL-6         | IL-7           | IL-8      | IL-10         |
| IL-12          | IL-13          | IL-15           | IFN- $\gamma$ | MCP-1        | MCP-2          | MCP-3          | MCSF         | MDC            | MIG       | MIP-1 $\beta$ |
| MIP-1 $\delta$ | RANTES         | SCF             | SDF-1         | TARC         | TGF- $\beta$ 1 | TNF- $\alpha$  | TNF- $\beta$ | EGF            | IGF-1     | Angiogenin    |
| Oncostatin M   | Thrombopoietin | VEGF            | PDGF-BB       | Leptin       | BDNF           | BLC            | CCL3         | Eotaxin        | Eotaxin-2 | Eotaxin-3     |
| FGF-4          | FGF-6          | FGF-7           | FGF-9         | Flt-3 ligand | Fractalkine    | GCP-2          | GDNF         | HGF            | IGFBP-1   | IGFBP-2       |
| IGFBP-3        | IGFBP-4        | IL-16           | IP-10         | LIF          | LIGHT          | MCP-4          | MIF          | MIP-3 $\alpha$ | NAP-2     | NT-3          |
| NT-4           | Osteopontin    | Osteoprotegerin | PARC          | PLGF         | TGF- $\beta$ 2 | TGF- $\beta$ 3 | TIMP-1       | TIMP-2         | POS       | POS           |

47

48

49

50

51

52

53
